# Supplementary material for: Peripheral blood CD86-positive plasmacytoid dendritic cells and immune-related adverse events in lung cancer patients
Source: Research Square preprint supplement (doi:10.21203/rs.3.rs-1627927/v3), 2022-11-08
Supplement: Supplementary file 1 [file 6191d6c2cb67d72ec9faadde.docx]

**Brief communication:**

**An increase in peripheral blood CD86-positive plasmacytoid dendritic cells is associated with immune-related adverse events after immune checkpoint inhibitor therapy in patients with non-small cell lung cancer**

**Authors:** Masato Karayama, MD, PhD; Yukihiro Mizoguchi, BS; Yusuke Inoue, MD, PhD; Hironao Hozumi, MD, PhD; Yuzo Suzuki, MD, PhD; Kazuki Furuhashi, MD, PhD; Tomoyuki Fujisawa, MD, PhD; Noriyuki Enomoto, MD, PhD; Yutaro Nakamura, MD, PhD; Naoki Inui, MD, PhD; Takafumi Suda, MD, PhD; Shigehisa Kitano, MD, PhD; Kazunori Aoki, MD, PhD; Yasuhide Yamada, MD, PhD.

**Supplementary Methods 1: Collection of PBMCs**

A total of 16 mL of peripheral blood samples were collected using two preparation tubes (8mL for each) containing sodium heparin (BD Vacutainer CPT; Becton, Dickinson and Company, Franklin Lakes, NJ, USA). The collection tubes were gently inverted 8 to 10 times to mix anticoagulant with blood. After centrifugation at 1500 × g for 15 min at room temperature, peripheral blood mononuclear cells (PBMCs) were in a whitish layer just under the plasma layer. Then PBMCs were collected with Pasteur pipettes and cryopreserved immediately in CellBanker 1® medium (Takara Bio Inc., Tokyo, Japan) and stored at −80°C.

**Supplementary Methods 2: Flow cytometry**

For assessment of immune cell types, aliquots of the frozen PBMCs were suspended in 50 L phosphate buffered saline (PBS). Then, the 50 L of fluorescent labeled-surface marker antibody (Supplementary Table) with Brilliant Stain Buffer (Becton, Dickinson and Company, Franklin Lakes, NJ, USA) was combined with PBMCs to make a total of 100 L of cell solution, followed by a 20 min incubation at 4°C. PBMCs were immediately washed once with 2.0 mL of PBS, and after washing, samples were fixed using BD CellFIX (Becton, Dickinson and Company, Franklin Lakes, NJ, USA). At least 50,000 live events were detected using an LSRFortessaTM X-20 flow cytometer with FACSDivaTM software (BD Biosciences, San Jose, CA, USA). For analysis of immune cell profile, at the beginning of the gating strategy, the discrimination of single cells from doublets was performed using a forward scatter-area (FSC-A) versus forward scatter-height (FSC-H), followed by using a side scatter-area (SSC-A) versus side scatter-height (SSC-H) bivariate plot. Then, the dead cells were removed using Fixable Viability Dye. All flow cytometric analyses were performed using FlowJo (BD Biosciences). Details of FCM panel and gating strategy are described in Supplementary Figure 1.

**Supplementary Table 1. Antibodies used for flow cytometry**

| Antigen | Conjugate | Company | Cat.# | Clone |
| --- | --- | --- | --- | --- |
| CD3 | BUV496 | BD | 612940 | UCHT1 |
| CD4 | BV650 | BL | 317436 | OKT4 |
| CD8 | APC-Cy7 | BL | 344714 | SK1 |
| CD11b | BV786 | BL | 301346 | ICRF44 |
| CD11c | AF700 | BD | 561352 | B-ly6 |
| CD14 | PerCP-Cy5.5 | BD | 550787 | M5E2 |
| CD16 | BUV395 | BD | 563785 | 3G8 |
| CD19 | PE-Cy5.5 | eBio | 35-0198-42 | SJ25C1 |
| CD56 | PE | BD | 347747 | MY31 |
| CD80 (B7-1) | BB515 | BD | 565008 | L307.4 |
| IgG1k, isotype control | BB515 | BD | 564416 | X40 |
| CD86 (B7-2) | BV605 | BL | 305430 | IT2.2 |
| IgG2bk, isotype control | BV605 | BL | 400350 | MPC-11 |
| CD123 | BV421 | BD | 562517 | 9F5 |
| CD141 | BV711 | BD | 563155 | 1A4 |
| CD273 (PD-L2) | APC | BL | 345508 | MIH18 |
| IgG1k, isotype control | APC | BL | 400122 | MOPC-21 |
| CD274 (PD-L1) | PE-Cy7 | BD | 558017 | MIH1 |
| IgG1k, isotype control | PE-Cy7 | BD | 557872 | MOPC-21 |
| HLA-DR | ECD | BC | IM3636 | Immu-357 |
| Fixable Viability Dye | eFluor506 | eBio | 65-0866-14 |  |

BD, Becton Dickinson; BL, BioLegend; eBio, eBioscience; BC, Beckman Coulter

**Supplementary Table 2: Definitions of immune cells**

| **Subset** | **Phenotype** |
| --- | --- |
| CD4+T cell | CD3+CD4+CD8- |
| CD8+T cell | CD3+CD4-CD8+ |
| B cell | CD3-CD19+ |
| Monocyte | CD3-CD19-CD14+CD11b+ |
| Proinflammatory monocyte | CD3-CD19-CD14+CD11b+CD16+HLA-DR+ |
| Monocytic myeloid derived suppressor cell (mMDSC) | CD3-CD19-CD14+CD11b+HLA-DR low/- |
| Myeloid dendritic cell (mDC) | CD3-CD19-CD14-CD56-HLA-DR+CD11c+CD123- |
| CD141+dendritic cell (CD141+DC) | CD3-CD19-CD14-CD56-HLA-DR+CD11c+CD123-CD141+ |
| Plasmacytoid dendritic cell (pDC) | CD3-CD19-CD14-CD56-HLA-DR+CD11c-CD123+ |
| Basophil | CD3-CD19-CD14-CD56-HLA-DR-CD123+ |
| Natural killer cell (NK) | CD3-CD19-CD14-CD56+CD16+ |
| Minor natural killer cell (minor NK) | CD3-CD19-CD14-CD56highCD16- |
| Natural killer T cell (NKT) | CD3+CD56+ |

**Supplementary Table 3: Results of all immune cells**

| **Types of immune cells** | **All cases** | **irAE (+)** | **irAE (−)** | ***p*-value** | **Responder** | **Non-responder** | ***p*-value** |
| --- | --- | --- | --- | --- | --- | --- | --- |
| **CD4+T cell** |  |  |  |  |  |  |  |
| %CD4+/PBMC | 22.4 (7.6-52.9) | 23.4 (15.4-36.7) | 20.2 (7.6-52.9) | 0.793 | 22.0 (15.4-38.3) | 22.8 (7.6-52.9) | 0.832 |
| %CD80+/CD4+ | 0.6 (0-1.8) | 0.4 (0-1.3) | 1.1 (0.1-1.8) | 0.227 | 0.6 (0.1-1.8) | 0.4 (0-1.5) | 0.672 |
| %CD86+/CD4+ | 1.1 (0.1-3.2) | 1.2 (0.1-2.1) | 0.8 (0.3-3.2) | 0.372 | 1.0 (0.1-3.2) | 1.3 (0.6-2.1) | 0.341 |
| %PD-L1+/CD4+ | 1.7 (0-5.2) | 2.0 (0.3-5.2) | 0.7 (0-3.8) | 0.128 | 2.1 (0.3-4.7) | 0.5 (0-5.2) | 0.290 |
| %PD-L2+/CD4+ | 0.2 (0-0.5) | 0.2 (0-0.5) | 0.1 (0-0.3) | 0.401 | 0.1 (0-0.3) | 0.2 (0-0.5) | 0.916 |
| **CD8+T cell** |  |  |  |  |  |  |  |
| %CD8+/PBMC | 12.1 (4.4-21.1) | 15.0 (6.4-31.3) | 11.6 (5.3-18.6) | 0.495 | 12.5 (6.4-17.5) | 18.2 (5.3-31.3) | 0.169 |
| %CD80+/CD8+ | 0(0-2.8) | 0 (0-2.8) | 0 (0-0.5) | 1.000 | 0(0-2.8) | 0 (0-0.1) | 0.101 |
| %CD86+/CD8+ | 2.5 (0.3-7.0) | 2.6 (1.0-7.0) | 1.3 (0.3-6.9) | 0.172 | 2.5 (0.5-6.9) | 2.6 (0.3-7.0) | 0.832 |
| %PD-L1+/CD8+ | 1.0 (0.2-3.1) | 1.1 (0.5-2.4) | 0.9 (0.2-3.1) | 0.372 | 1.0 (0.5-3.1) | 1.1 (0.2-2.4) | 0.597 |
| %PD-L2+/CD8+ | 0.5 (0-2.8) | 0.6 (0-2.2) | 0.2 (0-2.8) | 0.628 | 0.2 (0-2.8) | 0.6 (0-2.2) | 0.744 |
| **B cell** |  |  |  |  |  |  |  |
| %B cell/PBMC | 3.2 (0.3-7.8) | 2.2 (0.3-4.9) | 3.2 (1.0-7.8) | 0.318 | 2.1 (0.7-4.9) | 3.9 (0.3-7.8) | 0.204 |
| %CD80+/B cell | 34.4 (11.3-53.4) | 37.7 (26.9-53.4) | 29.7 (11.3-49.9) | 0.052 | 33.9 (25.9-53.4) | 34.8 (11.3-47.9) | 0.459 |
| %CD86+/B cell | 12.1 (1.9-53.1) | 16.3 (2.2-44.4) | 7.5 (1.9-53.1) | 0.156 | 12.2 (2.2-53.1) | 12.0 (1.9-44.4) | 0.397 |
| %PD-L1+/B cell | 1.7 (0-3.7) | 1.6 (0.8-3.7) | 1.9 (0-3.0) | 0.875 | 1.8 (0.4-3.7) | 1.4 (0-2.5) | 0.138 |
| %PD-L2+/B cell | 0.5 (0-2.5) | 0.1 (0-2.5) | 0.8 (0-1.5) | 0.188 | 1.1 (0-2.5) | 0.2 (0-1.2) | 0.111 |
| **Monocyte** |  |  |  |  |  |  |  |
| %monocyte/PBMC | 23.0 (6.4-60.1) | 27.3 (13.6-42.8) | 17.2 (6.4-60.1) | 0.637 | 25.7 (12.6-42.8) | 19.3 (6.4-60.1) | 0.916 |
| %CD80+/monocyte | 0.1 (0-1.5) | 0.1 (0-0.8) | 0.2 (0-1.5) | 0.706 | 0 (0-1.5) | 0.1 (0-0.5) | 0.703 |
| %CD86+/monocyte | 88.1 (24.4-99.2) | 86.7 (24.4-99.0) | 89.6 (51.9-99.2) | 0.637 | 90.9 (24.4-99.2) | 66.3 (51.9-98.7) | 0.169 |
| %PD-L1+/monocyte | 6.6 (2.1-78.1) | 7.3 (2.1-23.1) | 5.3 (2.1-78.1) | 0.637 | 5.9 (2.1-78.1) | 9.6 (2.1-23.1) | 0.832 |
| %PD-L2+/monocyte | 0.3 (0-0.8) | 0.3 (0-0.8) | 0.2 (0-0.6) | 0.371 | 0.1 (0-0.8) | 0.3 (0-0.3) | 0.596 |
| **mMDSC** |  |  |  |  |  |  |  |
| %mMDSC/PBMC | 0.5 (0.1-17.1) | 0.8 (0.1-6.5) | 0.4 (0.1-17.1) | 0.713 | 0.5 (0.1-5.1) | 0.5 (0.1-17.1) | 0.597 |
| %CD80+/mMDSC | 0 (0-13.3) | 0.1 (0-13.3) | 0 (0-2.4) | 0.365 | 0 (0-2.6) | 0 (0-13.3) | 0.715 |
| %CD86+mMDSC/mMDSC | 92.1 (27.1-100) | 91.7 (27.1-99.3) | 94.3 (62.8-100) | 0.713 | 95.5 (69.8-100) | 90.4 (27.1-97.3) | 0.090 |
| %PD-L1+mMDSC/mMDSC | 3.4 (0-76.5) | 5.6 (1.7-41.7) | 2.7 (0-76.5) | 0.318 | 2.9 (0-76.5) | 5.7 (1.4-41.7) | 0.597 |
| %PD-L2+mMDSC/mMDSC | 0 (0-8.4) | 0.6 (0-8.4) | 0 (0-0.41) | 0.056 | 0 (0-8.3) | 0 (0-8.4) | 0.816 |
| **Proinframmatory monocyte** |  |  |  |  |  |  |  |
| %proinframmatory monocyte/PBMC | 1.5 (0.2-9.8) | 1.6 (1.1-9.7) | 1.0 (0.2-3.3) | 0.104 | 1.5 (0.3-4.7) | 1.5 (0.2-9.7) | 0.916 |
| %CD80+/proinframmatory monocyte | 0.6 (0-15.6) | 0 (0-1.5) | 2.4 (0.2-15.6) | 0.051 | 0.7 (0-10.3) | 0.4 (0-15.6) | 0.874 |
| %CD86+/proinframmatory monocyte | 95.6 (67.3-100) | 96.4 (67.3-99.4) | 93.3 (81.2-100) | 0.793 | 95.6 (67.3-100) | 93.6 (81.2-98.9) | 0.397 |
| %PD-L1+/proinframmatory monocyte | 9.8 (2.6-60.5) | 8.5 (2.9-34.5) | 12.0 (2.6-60.5) | 0.637 | 7.5 (2.6-60.5) | 12.4 (6.2-34.5) | 0.204 |
| %PD-L2+/proinframmatory monocyte | 0.2 (0-6.3) | 0.4 (0-0.9) | 0.2 (0-6.3) | 0.914 | 0.1 (0-0.9) | 0.8 (0-6.3) | 0.142 |
| **mDC** |  |  |  |  |  |  |  |
| %mDC/PBMC | 0.9 (0.1-2.1) | 0.9 (0.1-2.1) | 0.6 (0.2-1.8) | 0.875 | 0.9 (0.1-2.1) | 0.8 (0.2-1.4) | 0.751 |
| %CD80+/mDC | 0(0-2.4) | 0 (0-0.9) | 0 (0-2.4) | 0.695 | 0.1 (0-2.4) | 0 (0-1.0) | 0.498 |
| %CD86+/mDC | 29.8 (2.3-81.8) | 34.0 (19.9-81.8) | 17.9 (2.3-79.1) | 0.318 | 25.9 (10.4-81.8) | 33.8 (2.3-69.5) | 0.459 |
| %PD-L1+/mDC | 4.0 (0-50.0) | 4.0 (0-50.0) | 5.7 (0-34.3) | 0.752 | 6.0 (0-50.0) | 1.9 (0-26.3) | 0.595 |
| %PD-L2+/mDC | 0.3 (0-2.3) | 0.3 (0-1.0) | 0.3 (0-0.3) | 0.958 | 0.1 (0-1.0) | 0.5 (0-2.3) | 0.237 |
| **pDC** |  |  |  |  |  |  |  |
| %pDC/PBMC | 0.2 (0-0.5) | 0.2 (0.1-0.5) | 0.2 (0-0.4) | 0.713 | 0.2 (0.1-0.3) | 0.3 (0-0.5) | 0.169 |
| %CD80+/pDC | 0 (0-1.1) | 0 (0-0.4) | 0 (0-1.1) | 0.700 | 0 (0-1.1) | 0 (0-0.2) | 0.641 |
| %CD86+/pDC | 5.1 (0-22.9) | 9.6 (2.2-22.9) | 2.4 (0-7.2) | 0.014 | 5.3 (0.4-22.9) | 5.0 (0-7.2) | 0.244 |
| %PD-L1+/pDC | 1.4 (0-68.9) | 6.0 (0-68.9) | 0.3 (0-23.5) | 0.169 | 4.2 (0-68.9) | 0.4 (0-13.0) | 0.337 |
| %PD-L2+/pDC | 0 (0-3.8) | 0.7 (0-3.8) | 0 (0-0) | 0.051 | 0 (0-3.8) | 0 (0-1.5) | 0.330 |
| **NK cell** |  |  |  |  |  |  |  |
| %NK cell/PBMC | 16.3 (4.7-33.0) | 14.6 (11.0-25.7) | 16.9 (4.7-33.0) | 0.954 | 18.9 (11.8-33.0) | 11.0 (4.7-18.8) | 0.024 |
| %CD80+/NK cell | 0 (0-0.3) | 0 (0-0.3) | 0 (0-0.3) | 0.848 | 0 (0-0.3) | 0 (0-0.3) | 1.000 |
| %CD86+/NK cell | 0.8 (0-2.9) | 1.1 (0.6-2.9) | 0.6 (0-2/5) | 0.031 | 1.0 (0-2.9) | 0.6 (0-2.8) | 0.314 |
| %PD-L1+/NK cell | 0.5 (0-1.6) | 1.1 (0-1.6) | 0.2 (0-1.3) | 0.115 | 0.7 (0-1.6) | 0.3 (0-1.3) | 0.596 |
| %PD-L2+/NK cell | 0.2 (0-1.3) | 0.2 (0-1.3) | 0.1 (0-0.6) | 0.518 | 0.2 (0-1.1) | 0.1 (0-1.3) | 0.871 |
| **NKT cell** |  |  |  |  |  |  |  |
| %NKT cell/PBMC | 3.1 (1.3-14.7) | 4.9 (1.9-14.0) | 2.1 (1.3-14.7) | 0.293 | 2.0 (1.9-12.3) | 5.5 (1.3-14.7) | 0.090 |
| %CD80+/NKT cell | 0(0-2.1) | 0.1 (0-2.1) | 0 (0-0.8) | 0.866 | 0.1 (0-2.1) | 0 (0-0.7) | 0.194 |
| %CD86+/NKT cell | 2.1 (0.6-10.7) | 2.4 (0.6-10.0) | 2.1 (0.8-10.7) | 0.958 | 2.9 (0.6-10.7) | 2.1 (0.7-3.2) | 0.459 |
| %PD-L1+/NKT cell | 1.7 (0.5-14.0) | 1.7 (0.7-14.0) | 1.7 80.5-10.3) | 0.793 | 1.8 (0.6-14.0) | 1.6 (0.5-2.6) | 0.525 |
| %PD-L2+/NKT cell | 0.3 (0-2.0) | 0.4 (0-2.0) | 0.1 (0-1.1) | 0.139 | 0.4 (0-2.0) | 0.1 (0-1.6) | 0.394 |
| **CD141+DC** |  |  |  |  |  |  |  |
| %CD141+DC/PBMC | 0 (0-0.2) | 0(0-0.2) | 0(0-0.1) | 0.207 | 0 (0-0.2) | 0(0-0.1) | 0.340 |
| %CD80+/CD141+DC | 4.3 (0-50.0) | 7.2 (0-50.0) | 2.1 (0-10.7) | 0.216 | 7.2 (0-50.0) | 2.1 (0-17.0) | 0.589 |
| %CD86+/CD141+DC | 39.2 (0-83.4) | 50.7 (24.8-83.4) | 34.2 (0-83.4) | 0.132 | 42.5 (0-83.4) | 36.8 (0-70.0) | 0.637 |
| %PD-L1+/CD141+DC | 4.2 (0-28.9) | 4.4 (1.7-21.5) | 0.9 (0-28.9) | 0.223 | 1.9 (0-28.9) | 4.5 (0-7.8) | 1.000 |
| %PD-L2+/CD141+DC | 0.3 (0-59.7) | 0.5 (0-28.6) | 0 (0-59.7) | 0.583 | 0.3 (0-59.7) | 1.8 (0-17.0) | 0.756 |
| **Minor NK cell** |  |  |  |  |  |  |  |
| %minor NK cell/PBMC | 0.4 (0.1-1.1) | 0.4 (0.1-0.8) | 0.3 (0.1-1.1) | 0.431 | 0.4 (0.1-0.8) | 0.3 (0.1-1.1) | 0.751 |
| %CD80+/minor NK cell | 0.1 (0-48.2) | 0.2 (0-48.2) | 0 (0-22.7) | 0.547 | 0.3 (0-48.2) | 0 (0-22.7) | 0.185 |
| %CD86+/minor NK cell | 4.0 (0-23.4) | 9.0 (0-23.4) | 2.5 (0-13.3) | 0.293 | 8.0 (1.6-23.4) | 2.7 (0-19.1) | 0.340 |
| %PD-L1+/minor NK cell | 1.2 (0-2.6) | 0.9 (0-2.6) | 1.2 (0-2.2) | 1.000 | 1.5 (0-2.6) | 0 (0-1.6) | 0.082 |
| %PD-L2+/minor NK cell | 0.4 (0-3.8) | 0.4 (0-1.3) | 0.9 (0-3.8) | 0.560 | 0.4 (0-2.5) | 1.0 (0-3.8) | 0.670 |
| **Basophil** |  |  |  |  |  |  |  |
| %basophil/PBMC | 0(0-5.0) | 0(0-0.2) | 0(0-5.0) | 0.207 | 0(0-0.2) | 0(0-5.0) | 0.290 |
| %CD80+/basophil | 0.1 (0-6.8) | 1.0 (0-6.8) | 0.1 (0-4.5) | 0.614 | 0.3 (0-6.8) | 0 (0-2.0) | 0.309 |
| %CD86+/basophil | 2.8 (0-74.0) | 4.2 (0-13.3) | 2.8 (0-74.0) | 0.706 | 2.3 (0-74.0) | 3.3 (0-11.6) | 0.828 |
| %PD-L1+/basophil | 13.7 (0-69.5) | 22.7 (0-43.5) | 7.0 (0-69.5) | 0.401 | 25.0 (0-69.5) | 8.0 (0-43.5) | 0.125 |
| %PD-L2+/basophil | 0 (0-39.3) | 0 (0-39.3) | 0 (0-37.5) | 0.809 | 0.8 (0-39.3) | 0 (0-0.1) | 0.068 |

Data are expressed as median (range). irAE, immune-related adverse event; mDC, myeloid dendritic cell; mMDSC, monocytic myeloid derived suppressor cell, NK cell, natural killer cell, NKT cell, natural killer T cell; PBMC, peripheral blood mononuclear cell; pDC, plasmacytoid dendritic cell; PD-L1, programmed death-ligand 1; PD-L2, programmed death-ligand 2

**Supplementary Figure 1. Phenotypic characterization of Immune cell subsets by flow cytometry.**

**Supplementary Figure 2. Time course of levels of peripheral CD86+pDCs in individual case**

**
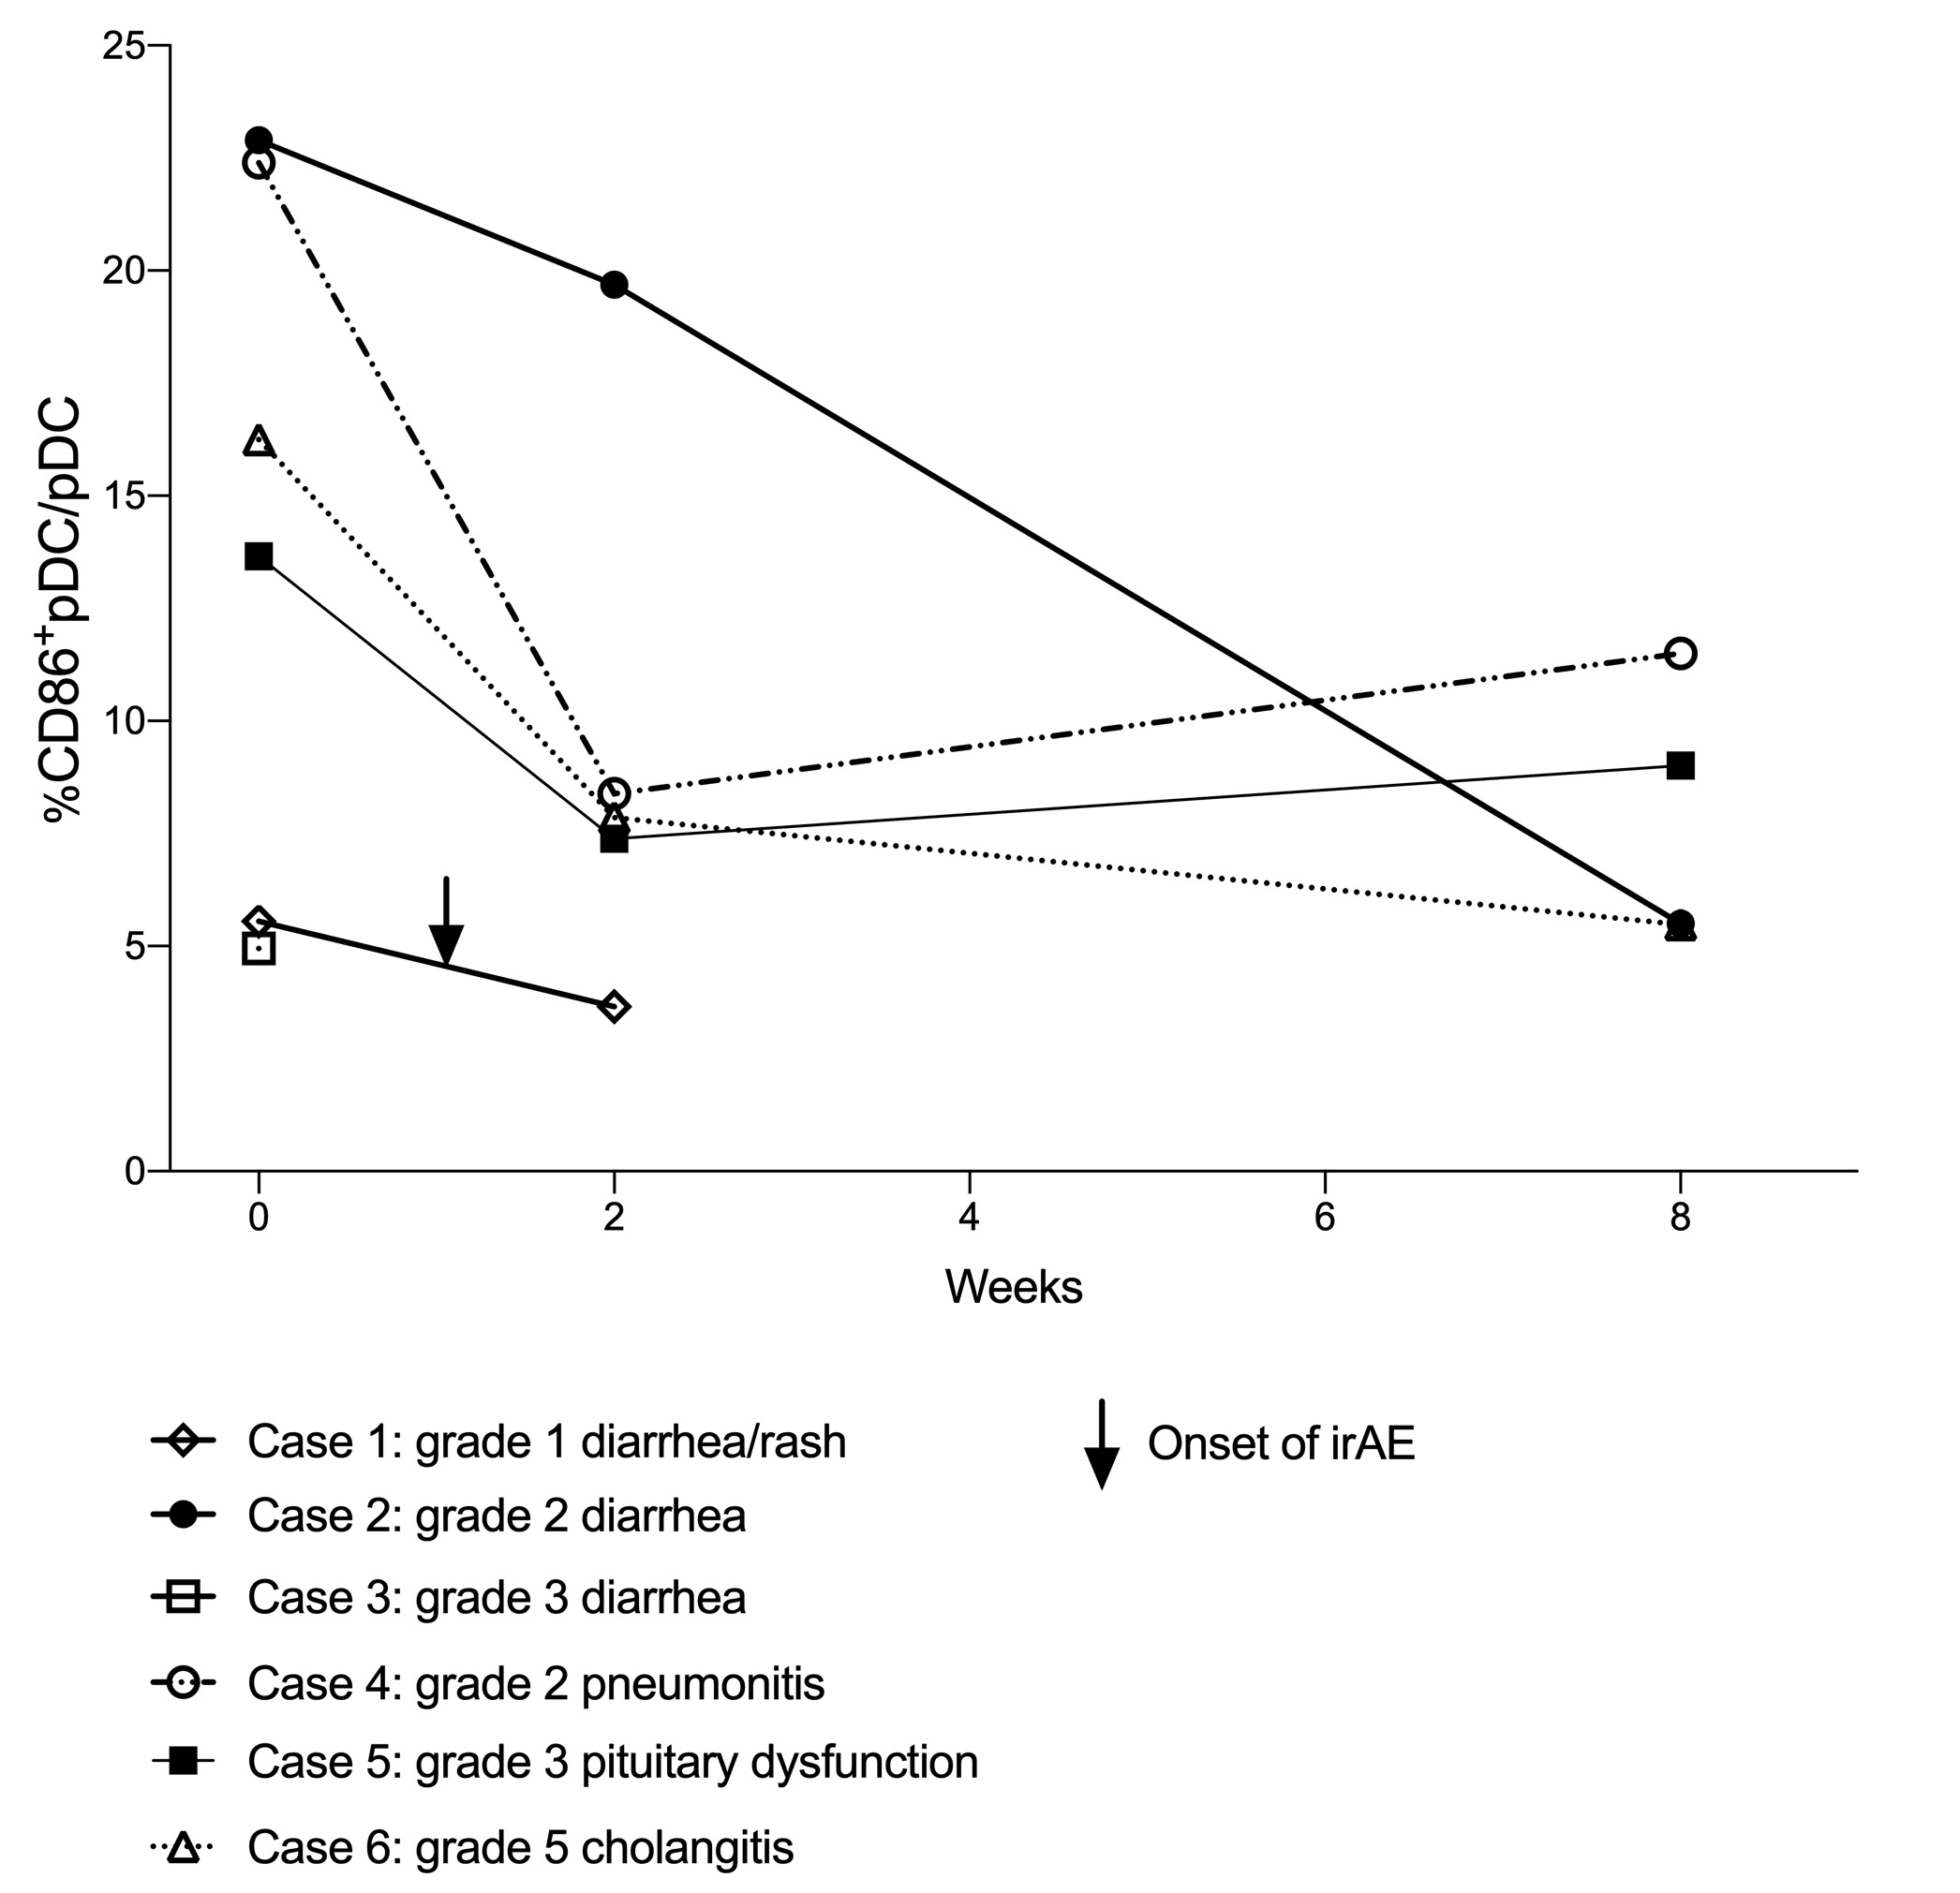
**

An arrow indicates the occurrence of irAE in Case 1. In case 3, grade 3 diarrhea occurred at 23 days after ICI therapy; however, blood samples at 2 and 8 weeks were not available. The other cases experienced irAEs more than 8 weeks after ICI therapy.

**Supplementary Figure 3. Levels of peripheral CD86+pDCs and severity of irAEs**

**
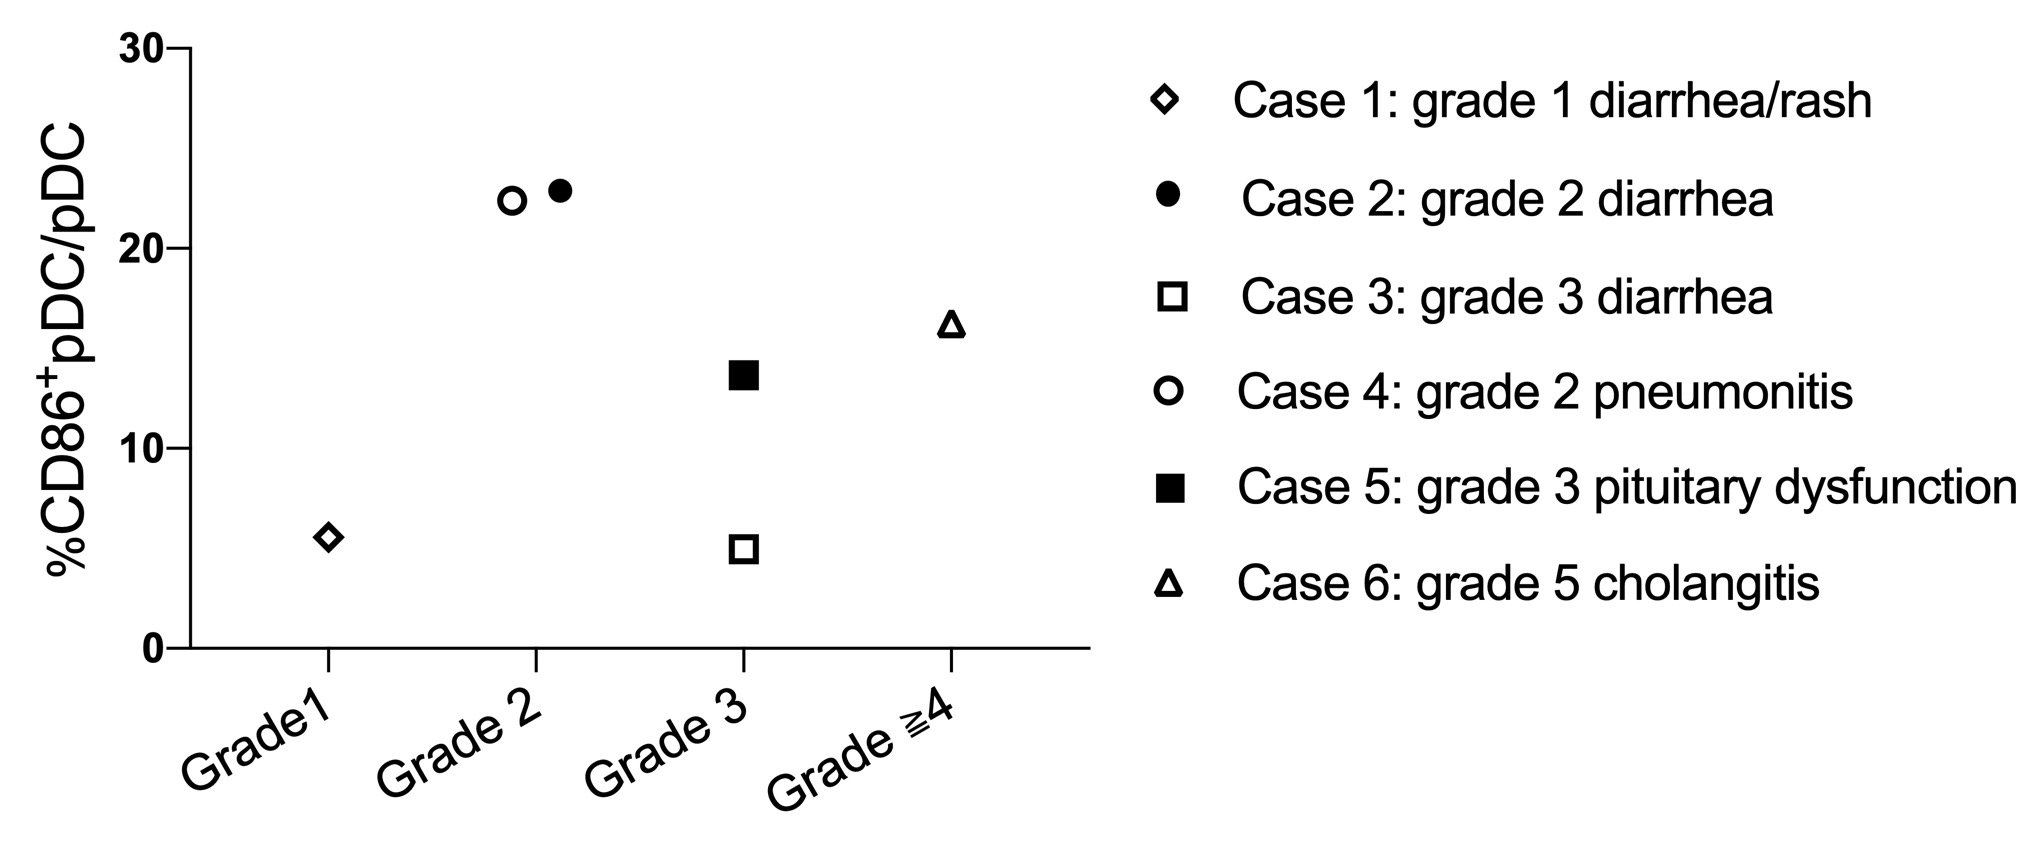
**

**Supplementary Figure 4. Levels of peripheral CD86+pDCs and onset of irAEs**

**
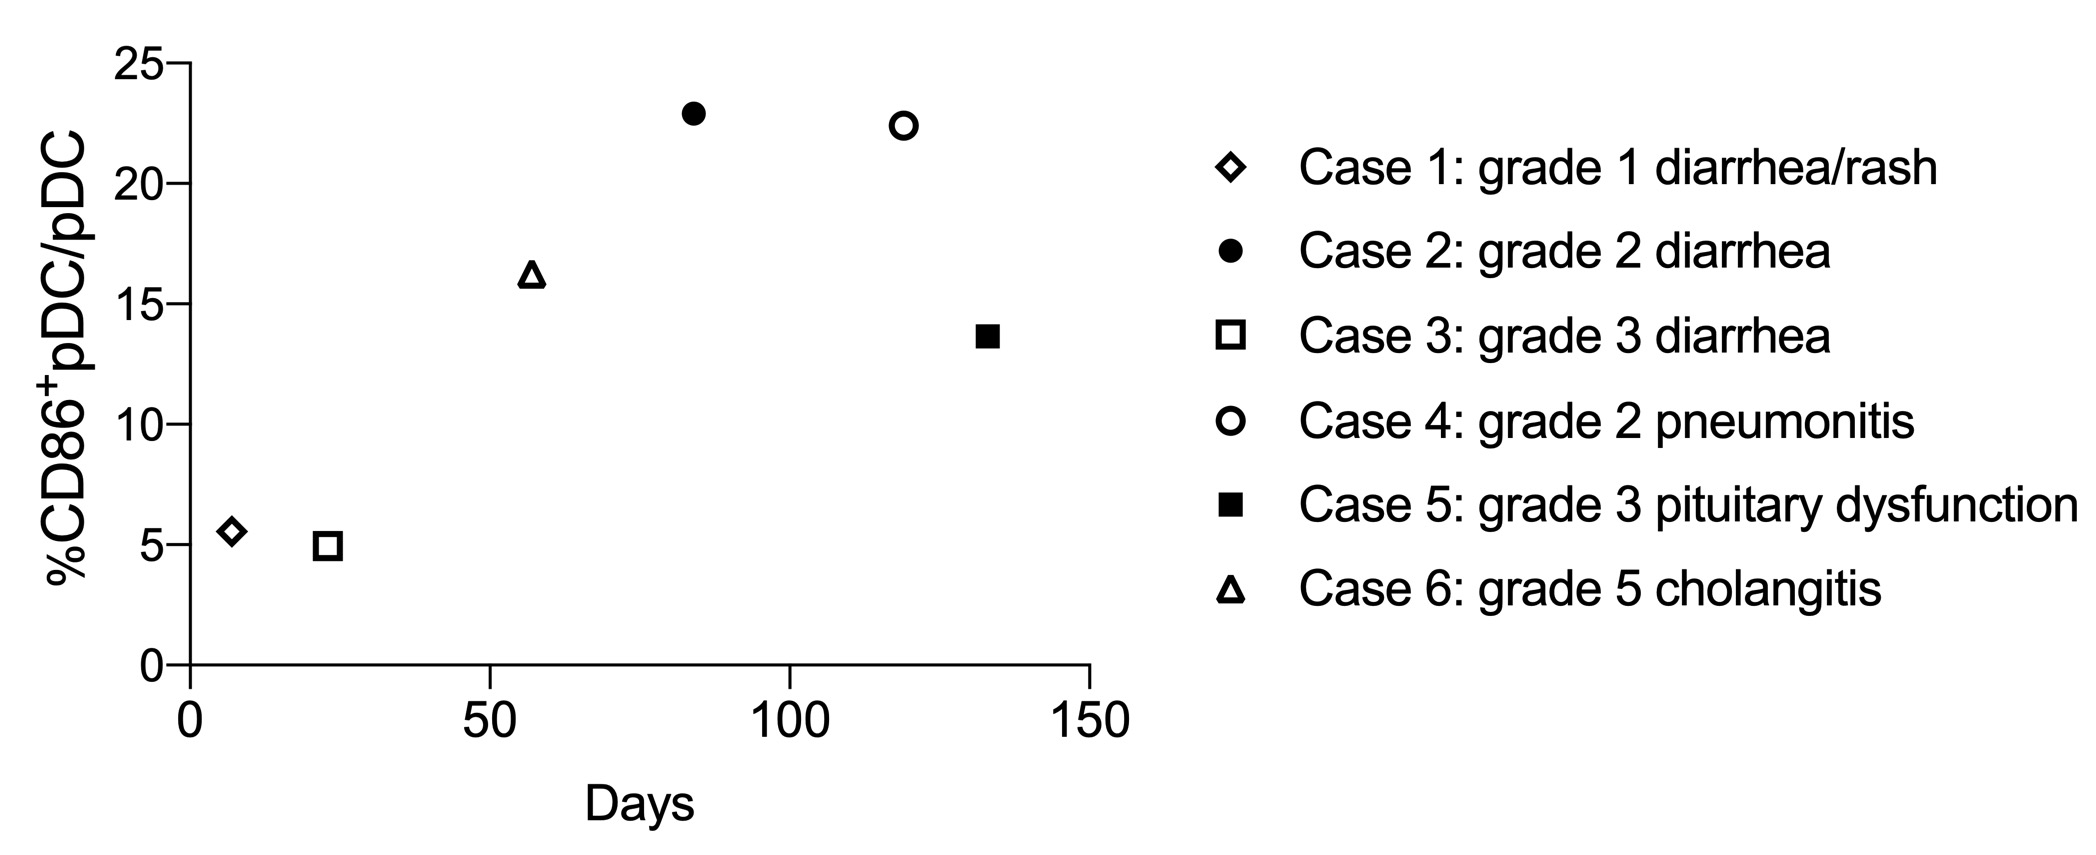
**
